# Supplementary material for: Long-term trends in aerosol properties derived from AERONET measurements
Source: Copernicus journal article supplement (doi:10.5194/egusphere-2024-2533), 2024-08-22
Supplement: Supplementary file [file egusphere-2024-2533-AC1-supplement.pdf]

1 **Reply to anonymous referee #1:**

2 We appreciate the reviewer for his/her thoughtful comments and suggestions, which are  
3 very helpful in improving our manuscript. We have carefully considered all the comments  
4 and revised the manuscript and the supplementary accordingly. Below is a point-by-point  
5 response to these comments.

6 **Minor comments:**

- 7 1. General question about the stations selected in this study: I'm curious to know why  
8 polar stations are not included in the analysis, despite some of them, such as Opal  
9 or Andenes, having long-term observations. It is also evident from Figure 1 that  
10 there is a clear bias towards Europe and the United States.

11 The stations in this study is selected based on the method described in Sect. 2.1, which  
12 requires stations to have at least 8 monthly measurements for each year for temporal  
13 representativeness. Polar stations often have no monthly measurements in winter due to  
14 inadequate sunlight and thus fail to meet the above condition. Fig. R1 shows the monthly  
15 median AOD for two polar sites, OPAL and Andenes. The two sites have no data during  
16 November-February, and the time series for OPAL is much discontinuous. Considering  
17 that the measurements at polar stations concentrate in fixed seasons (summer), we revised  
18 the standard for polar stations in the MS (lines 95-97):

19 *“Considering polar stations often have no monthly measurements in winter, the least*  
20 *number of monthly medians for each year are reduced to 4 for stations at latitudes above*  
21 *65 degrees.”*

22 Seven sites (Andenes, Barrow, Hornsund, Kangerlussuaq, PEARL, Resolute\_Bay, and  
23 Thule) located in the Arctic was selected in this study, and all of them exhibit negative  
24 AOD trends, suggesting decreased AOD in the Arctic.

25 Indeed, the selected stations are biased towards North America and Europe. 61 and 48  
26 stations selected in this work are located in Europe and North America respectively. This  
27 is due to the higher density and better data maintenance of the stations in Europe.

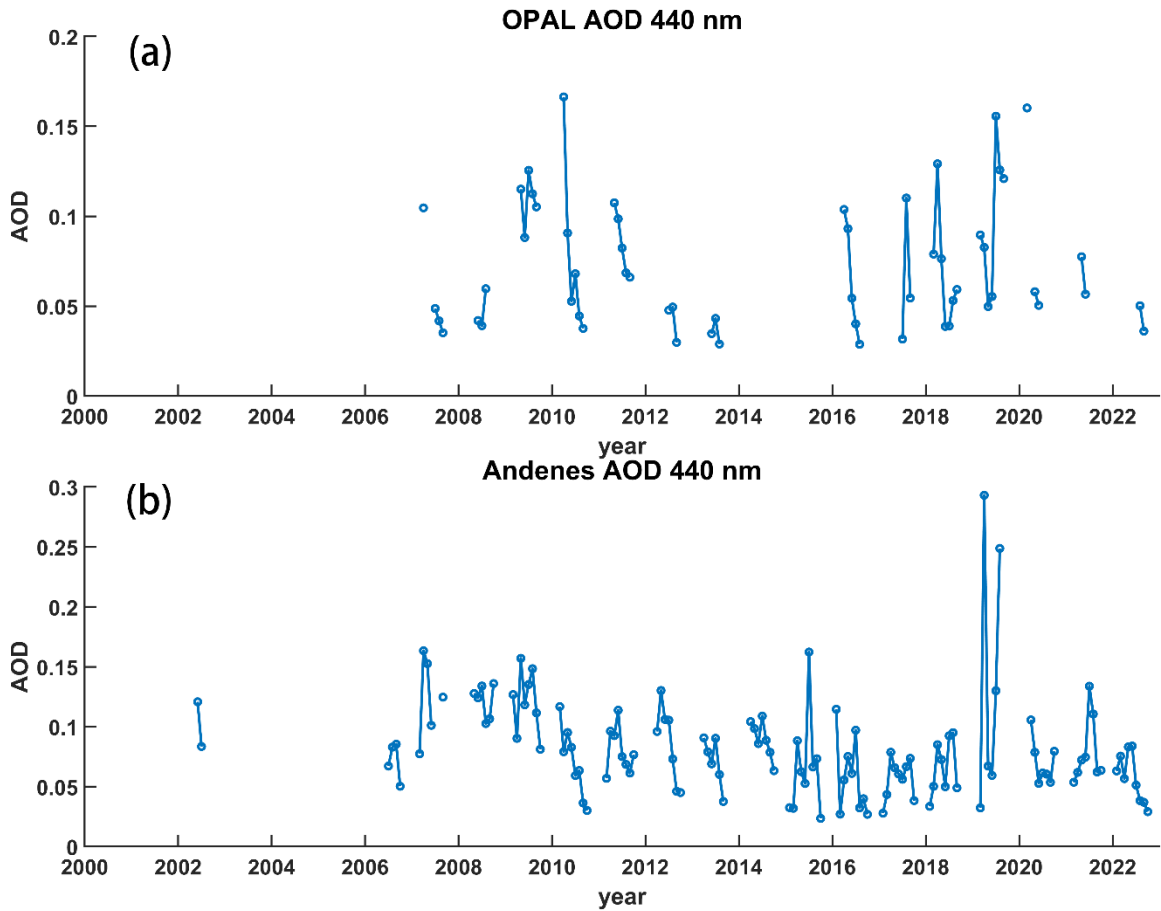

28

29 **Figure R1: Time series of 440 nm AOD at (a) OPAL and (b) Andenes.**

30 2. Figure 2 and the stations selected for discussion: The rationale for selecting the  
 31 stations displayed in this figure is not clear.

32 Fig. 2 is only a reference for reader to know the location of stations mentioned in the MS,  
 33 which has been mentioned in the MS in line 105:

34 *“Locations of stations mentioned in the manuscript are presented in Fig. 2.”*

35 These stations are mentioned when analyzing particular cases (i.e., Birdsville), or showing  
 36 time series as representative stations at specific regions. For the latter, the stations are  
 37 selected according to their spatial representativeness, length of records, and significance  
 38 and magnitude of the trends for some parameters.

39 Locations of other stations could be found in the supplementary, which has been mentioned  
 40 in the MS in line 103:

41 *“Locations, trends and time series for all the stations could be found in the supplementary.”*

42 3. General comment about general-global trends results: Given that this paper aims to  
43 study general trends on a global scale, I wonder if it would be more appropriate to  
44 quantify the results in terms of regions. Currently, the quantification of the observed  
45 trends is done only in terms of the different stations defined (in a way that is not  
46 clear to me) in Figure 2.

47 Thanks for the suggestion. We did attempt to calculate regional trends. However,  
48 considering the lifetime and spatial heterogeneity of aerosols, the ground-based stations  
49 have limits in spatial coverage and representativeness, and for some regions, the numbers  
50 of stations are too few to represent the entire region. Moreover, direction of regional trends  
51 could be summarized qualitatively if the trends are coherent for stations in the region, but  
52 it is difficult to quantify the magnitude and significance of the trends for a region, as trends  
53 of some stations are not significant or even opposite to those of most stations in the region.  
54 Therefore, we mainly summarized the magnitude and significance of the trends for the  
55 majority of the stations in a specific region.

56 As mentioned in Minor Comment #2, Fig. 2 is only a reference for the readers to know the  
57 location of stations mentioned in the MS. Only representative stations are marked. When  
58 there are very limited stations located in the region, we discuss the station-based trends.  
59 When there are many stations with coherent trends, we discuss the trend by region. We  
60 have also added a table summarizing the trends and locations of all stations in the  
61 supplementary, and mentioned it in the MS in line 103:

62 *“Locations, trends and time series for all the stations could be found in the supplementary.”*

63 4. A more general question: Do the authors have any ideas about the general lack of  
64 statistical significance of the results found over the African continent? While AOD  
65 and AE trends are significant over the Arabian Peninsula, suggesting a possible  
66 increase in dust activity in this region, there is no statistical significance over Africa.  
67 Some recent studies show declining DOD trends across the Sahara and the Eastern  
68 Mediterranean. Do the authors have any insights on this?

69 Aerosols in West Africa are primarily composed of dust, which has strong natural  
 70 variability, making it difficult to obtain a significant trend. Trends of dust loading in Sahara  
 71 is still uncertain. Shao et al. (2013) reported decreased dust activities in Sahara, whereas  
 72 Merdji et al. (2023) reported increased dust loading. Trends in the two studies are generally  
 73 weak and not that significant. In our work, we also found the trends in aerosol parameters  
 74 generally insignificant or spatially incoherent, as can be seen in the time series of stations,  
 75 Banizoumbou and IER\_Cinzana. AOD and AE both exhibit substantial variability, ranging  
 76 from 0.2 to 1.0, and the trends are weak and insignificant.

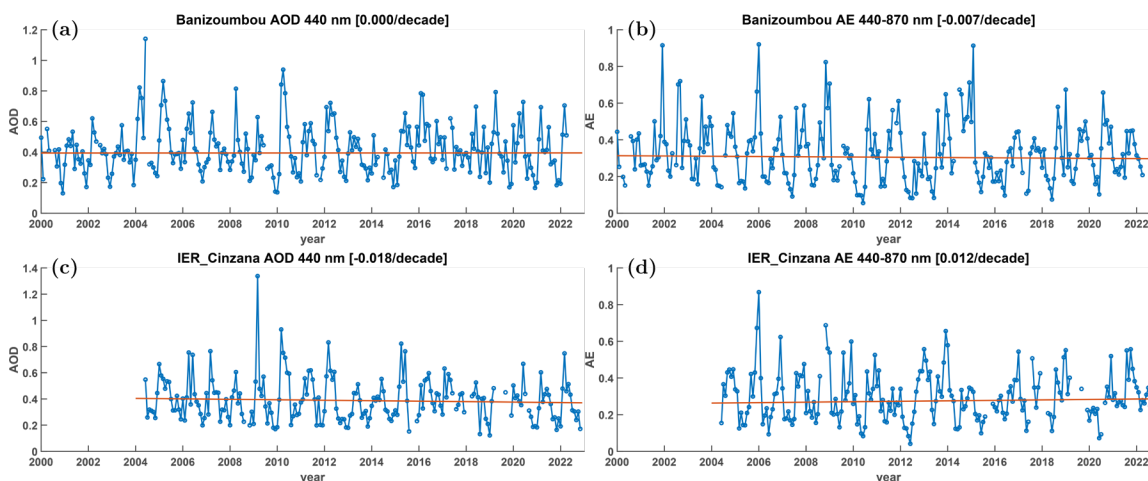

77

78 **Figure R2:** Left: Time series of 440 nm AOD. Right: Time series of 440-870 nm AE. (a, b)  
 79 Banizoumbou, (c, d) IER\_Cinzana.

80 **Technical comments:**

81 1. Figure 1: Why is panel (a) labeled as “Solar” Level 2.0? I recommend using the  
 82 terminology “Direct Sun,” consistent with AERONET products.

83 Thanks for the suggestion. We have revised the title of Fig. 1(a) in the MS.

84 2. Line 96: I don’t understand the relevance of mentioning the “unique data logging”  
 85 system used in Australia. Was there a problem with the acquisition time of the  
 86 photometer?

87 We are sorry for the confusion. We found a jump in AOD (more than a doubling of AOD)  
 88 at Birdsville in 2019 and 2020, which coincides with the timing of the update of the

89 algorithm. This jump could also be found in Yang et al. (2021). This is likely due to a data  
90 filtering artifact of the QA of the algorithm of Giles et al. (2019) that eliminated only the  
91 low AOD days (personal communication, T. Eck). This particular issue involves the way  
92 data are uniquely time stamped in Australia and does not occur at sites in the rest of the  
93 network.

94 3. Line 97: In line with the previous comment, the authors mention an unnatural  
95 increase in AOD in Birdsville. Are the authors referring to a diurnal cycle or to the  
96 Kciclo, as explained by Cachorro et al. (2009) and subsequent papers?

97 The jump of AOD at Birdsville could be observed on monthly and annual time series.  
98 According to Cachorro et al. (2008), the difference caused by KCICLO seems to be largely  
99 reduced when analyzing monthly and annual averaged data. We tend to believe that this  
100 discontinuity was caused by the algorithm upgrade. When upgrading the algorithm in the  
101 future to V4 of the AERONET database, this problem might be solved (personal  
102 communication, T. Eck).

103 4. Line 120: Sea salt is not included in the aerosol typing, even though it is one of the  
104 most abundant aerosol species in Earth's atmosphere, and its hygroscopicity is an  
105 important parameter for quantifying its interaction with solar radiation.

106 We are sorry for the confusion. We also think that sea salt has important climate effect. In  
107 this study, sea salt is only excluded in aerosol type analysis (Sect. 3.3), because this type  
108 accounts for only 2.5% percent of total records which is too small to calculate trends, and  
109 is mainly detected at oceanic stations with low AOD levels and thus high uncertainties.  
110 When analysing AOD, AE, AAOD, and SSA, sea salt records are not excluded. We have  
111 revised the description in lines 170-174 for clarity:

112 *"It should be noted that sea salt aerosols typically having  $FMF_{550}$  below 0.4 and  $SSA_{440}$*   
113 *around 0.98 (included in the "Uncertain" type in Table 1) are not considered in the analysis*  
114 *of aerosol type trends (Sect. 3.3), because most AERONET stations are located over land*  
115 *where sea salt is not the predominant type, and sea salt aerosols only account for a*  
116 *negligible proportion (about 2.5% for "Uncertain" type)."*

117 5. Figure 3: I find this figure (and the following figures that use the same criterion)  
118 difficult to understand due to the exclusive use of dots. I suggest that the authors  
119 improve the figure by using different symbols to indicate varying levels of  
120 statistical significance.

121 Thanks for the suggestion. We updated the maps in the MS with different symbols to  
122 indicate different levels of statistical significance. Specifically, we use dots to indicate  
123 trends at 90% significance, and use triangle to represent trends below 90% significance  
124 level.

125 6. Figure 4: Are the stations used in this figure selected for a specific reason? Are they  
126 chosen based on their geographical location, or do they represent significant trends?  
127 Additionally, why does Figure 4c contain two different stations in the same panel?  
128 It is difficult to distinguish between the two lines. Another suggestion is to include  
129 the country name in each subfigure label to help focus the reader's attention on the  
130 specific region discussed in the text. This suggestion could also be applied to other  
131 similar figures.

132 Thanks for the suggestion. We have added names of the regions in each subfigure.

133 As mentioned in Minor Comment #2, the stations in Fig. 5 (and following similar figures)  
134 are mainly selected according to the spatial representativeness of stations, length of records,  
135 and significance and magnitude of the trends.

136 The two stations, Beijing and XiangHe, are combined for better comparison, as explained  
137 in the MS in lines 200-202:

138 *"A comparison between  $AOD_{440}$  time series of XiangHe and Beijing (Fig. 5c), two*  
139 *stations located very close to each other in East China, would further reveal that the*  
140 *substantial reduction of  $AOD_{440}$  mainly occurred in the later years."*

141 7. Line 135: The authors discuss the different rates of AOD reduction found in  
142 Western Europe compared to the values reported by Li et al. (2014). It would be  
143 very helpful if they could include the specific numbers found in that paper and also  
144 reference Figures 4h and 4g.

145 Thanks for the suggestion. The AOD reduction rates reported by Li et al. (2014) in Western  
146 Europe were -0.1 per decade, while those in this work are generally -0.05 per decade. We  
147 have added these comparisons in the MS in lines 185-186:

148 *“The rates of AOD<sub>440</sub> reduction in western Europe (about -0.05 per decade) are not as*  
149 *substantial as those reported in Li et al. (2014), which was -0.1 per decade, suggesting a*  
150 *decelerated aerosol reduction rate in Europe in recent years.”*

151 8. Lines 141-144: The authors state that, according to previous studies, a substantial  
152 reduction in AOD has occurred in the last decade. However, looking at Figure 4a,  
153 for instance, I see a reduction in AOD over the entire period, starting from 2002.  
154 Did the authors analyse the presence of any breakpoints in these datasets?

155 We are sorry for the confusion. We have updated the result, and records before 2009 at  
156 Chen-Kung\_ Univ are filtered. In fact, at most stations over East Asia, the AOD first  
157 increased or remained stable, and then decreased. The AOD reduction over these stations  
158 mainly occurred after 2008 (i.e., Osaka, Beijing, and XiangHe). We have also revised the  
159 description in lines 194-198:

160 *“However, the trend of AOD<sub>440</sub> in East Asia is not coherent throughout the period of 2000-*  
161 *2022. According to the AOD<sub>440</sub> time series (Fig. 5a-c), AOD<sub>440</sub> increased in the early*  
162 *2000s, and decreased rapidly in the later years since around 2008, consistent with other*  
163 *regional aerosol trend studies (Eom et al., 2022; Gupta et al., 2022; Li, 2020; Lyapustin*  
164 *et al., 2011; Meij et al., 2012; Ramachandran et al., 2020; Ramachandran & Rupakheti,*  
165 *2022; Yoon et al., 2012).”*

166 9. Lines 150 and 162: The authors mention results for “several oceanic island stations”  
167 in these two lines, while they also state that sea salt aerosols, the dominant species  
168 at these sites, are not included in the analysis. Do they expect a bias in these sites  
169 because of this omission?

170 We are sorry for the confusion. The sea salt aerosols are only excluded in aerosol type  
171 analysis in Sect. 3.3, which have been explained in the response to Minor Comment #4.  
172 All of the AOD, AE, AAOD and SSA trend analyses in the MS include oceanic sites.

173 As sea salt is the dominant aerosol type at oceanic sites, the positive AOD trends for these  
174 stations could be mainly attributed to increases of sea salt aerosols. We have also added  
175 the description about increased sea salt at these oceanic sites in the MS in lines 218-220:

176 *“In addition to Nauru which exhibits significant positive AOD<sub>440</sub> trend, some other*  
177 *oceanic stations worldwide also exhibit positive AOD<sub>440</sub> trends, suggesting a widespread*  
178 *increase in oceanic aerosols, primarily sea salts. This result is consistent with Hsu et al.*  
179 *(2012) who also reported an increase in oceanic AOD.”*

180 10. Line 155: Is the AOD trend 0.066 per decade according to Figure 4e?

181 Thanks for pointing this out. We are referring to the trend in Fig. 5e here, which should be  
182 0.062 instead of 0.066. We forgot to update the value in the previous MS. We have updated  
183 Fig. 5e and revised the trend value to 0.062.

184 11. Line 158: Is the AOD trend 0.166 per decade according to Figure 4f?

185 We are sorry that this is the same issue as that in the last comment. We have updated Fig.  
186 5f and revised the trend value to 0.167.

187 12. Line 161: In line 96, the authors attribute the problems in Birdsville to the logging  
188 system, but now they attribute it to a data screening anomaly. I don't understand  
189 either of these terms. I suspect there is a calibration problem (diurnal cycle or  
190 Kciclo); can the authors confirm?

191 We are sorry for the confusion. As detailed in Technical Comment #2&#3, the artifact of  
192 the QA of the algorithm eliminated the low AOD records, thus likely led to a jump in AOD.

193 13. Line 194: The discussion introduced here about significant positive trends in some  
194 places in Asia is interesting. Why not include one of these stations in Figure 6?

195 Thanks for the suggestion. In fact, Chen-Kung\_ Univ (Fig. 6a in the previous MS draft) is  
196 one of these stations in the Taiwan Island, which exhibit significant positive AE trend in  
197 the previous MS draft. However, in the updated result, the AE trend over most of these  
198 Asia stations are not significant or coherent, therefore we revised the analysis in the MS in  
199 lines 235-238:



200 “East Asia exhibits no significant  $AE_{440-870}$  trends, indicating weak changes in the ratio  
201 of fine-mode and coarse-mode aerosols. Therefore, the great decrease of aerosol loading in  
202 East Asia revealed in Fig. 4 might be related to similar reductions in both anthropogenic  
203 fine-mode aerosols and coarse-mode dust in these areas.”

204 14. Section 3.2: The two paragraphs starting at lines 241 and 256 are meant to provide  
205 the results related to AOD and SSA, respectively. However, these two variables  
206 are mixed throughout both paragraphs, making it difficult for the reader to follow  
207 the discussion. I wonder if the authors could present these two pieces of information  
208 in a clearer manner.

209 Thanks for the suggestion. We have revised the two paragraphs to separately discuss the  
210 two parameters.

211 15. Line 271: The authors mention a positive SSA trend in Solar Village. However, in  
212 Figure 12d, there is a negative SSA trend of -0.034 per decade. Can the authors  
213 clarify this discrepancy?

214 We are sorry for the confusion. The SSA trend in Solar Village is negative. We have revised  
215 the MS in lines 297-298:

216 “Negative  $SSA_{440}$  trend for Solar\_Village (Fig. 13b) in the Arabian Peninsula is attributed  
217 to increases in absorbing dust aerosols.”

218 16. Section 3.3: I recommend using italics or quotation marks when referring to the  
219 different types of aerosols, such as “Mixture,” “Dust,” or “Non-absorbing,” for  
220 example. I also suggest including the abbreviations SA, MA, and HA in the figure  
221 captions or somewhere in the text, since they were introduced in Table 1 (page 6).

222 Thanks for the suggestion. We have used quotation marks to refer to aerosol types in the  
223 MS.

224 17. Section 4: This section is quite long and difficult to read. Rather than focusing on  
225 highlighting the most relevant results of this study, it seems to center on the  
226 differences observed with the paper published by Li et al. (2014). I recommend

227 summarizing and streamlining this section to emphasize the important findings of  
228 the authors.

229 Thanks for the suggestion. We have revised Sect. 4 into a more concise expression. In  
230 particular, we shortened the comparison with Li et al. (2014) and added more recent  
231 references.

## 232 **References**

233 Cachorro, V. E., Toledano, C., Sorribas, M., Berjón, A., Frutos, A. M. de, & Laulainen, N.  
234 (2008). An “in situ” calibration-correction procedure (KCICLO) based on AOD diurnal  
235 cycle: Comparative results between AERONET and reprocessed (KCICLO method) AOD-  
236 alpha data series at el arenosillo, spain. *Journal of Geophysical Research: Atmospheres*,  
237 *113*(D2). <https://doi.org/10.1029/2007jd009001>

238 Eom, S., Kim, J., Lee, S., Holben, B. N., Eck, T. F., Park, S.-B., & Park, S. S. (2022).  
239 Long-term variation of aerosol optical properties associated with aerosol types over east  
240 asia using AERONET and satellite (VIIRS, OMI) data (20122019). *Atmospheric Research*,  
241 *280*, 106457. <https://doi.org/10.1016/j.atmosres.2022.106457>

242 Gupta, G., Venkat Ratnam, M., Madhavan, B. L., & Narayanamurthy, C. S. (2022). Long-  
243 term trends in aerosol optical depth obtained across the globe using multi-satellite  
244 measurements. *Atmospheric Environment*, *273*, 118953.  
245 <https://doi.org/10.1016/j.atmosenv.2022.118953>

246 Hsu, N. C., Gautam, R., Sayer, A. M., Bettenhausen, C., Li, C., Jeong, M. J., et al. (2012).  
247 Global and regional trends of aerosol optical depth over land and ocean using SeaWiFS  
248 measurements from 1997 to 2010. *Atmospheric Chemistry and Physics*, *12*(17), 8037–8053.  
249 <https://doi.org/10.5194/acp-12-8037-2012>

250 Li, J. (2020). Pollution trends in china from 2000 to 2017: A multi-sensor view from space.  
251 *Remote Sensing*, *12*(2), 208. <https://doi.org/10.3390/rs12020208>

252 Li, J., Carlson, B. E., Dubovik, O., & Lacis, A. A. (2014). Recent trends in aerosol optical  
253 properties derived from AERONET measurements. *Atmospheric Chemistry and Physics*,  
254 *14*(22), 12271–12289. <https://doi.org/10.5194/acp-14-12271-2014>

255 Lyapustin, A., Smirnov, A., Holben, B., Chin, M., Streets, D. G., Lu, Z., et al. (2011).  
256 Reduction of aerosol absorption in beijing since 2007 from MODIS and AERONET.  
257 *Geophysical Research Letters*, *38*(10), L10803. <https://doi.org/10.1029/2011gl047306>

258 Meij, A. de, Pozzer, A., & Lelieveld, J. (2012). Trend analysis in aerosol optical depths  
259 and pollutant emission estimates between 2000 and 2009. *Atmospheric Environment*, *51*,  
260 75–85. <https://doi.org/10.1016/j.atmosenv.2012.01.059>

261 Merdji, A. B., Lu, C., Xu, X., & Mhawish, A. (2023). Long-term three-dimensional  
262 distribution and transport of saharan dust: Observation from CALIPSO, MODIS, and  
263 reanalysis data. *Atmospheric Research*, *286*, 106658.  
264 <https://doi.org/10.1016/j.atmosres.2023.106658>

265 Ramachandran, S., & Rupakheti, M. (2022). Trends in physical, optical and chemical  
266 columnar aerosol characteristics and radiative effects over south and east asia: Satellite and  
267 ground-based observations. *Gondwana Research*, *105*, 366–387.  
268 <https://doi.org/10.1016/j.gr.2021.09.016>

269 Ramachandran, S., Rupakheti, M., & Lawrence, M. G. (2020). Aerosol-induced  
270 atmospheric heating rate decreases over south and east asia as a result of changing content  
271 and composition. *Scientific Reports*, *10*(1). <https://doi.org/10.1038/s41598-020-76936-z>

272 Shao, Y., Klose, M., & Wyrwoll, K. (2013). Recent global dust trend and connections to  
273 climate forcing. *Journal of Geophysical Research: Atmospheres*, *118*(19).  
274 <https://doi.org/10.1002/jgrd.50836>

275 Yang, X., Zhao, C., Yang, Y., & Fan, H. (2021). Long-term multi-source data analysis  
276 about the characteristics of aerosol optical properties and types over australia. *Atmospheric  
277 Chemistry and Physics*, *21*(5), 3803–3825. <https://doi.org/10.5194/acp-21-3803-2021>

278 Yoon, J., Hoyningen-Huene, W. von, Kokhanovsky, A. A., Vountas, M., & Burrows, J. P.  
279 (2012). Trend analysis of aerosol optical thickness and ångström exponent derived from  
280 the global AERONET spectral observations. *Atmospheric Measurement Techniques*, 5(6),  
281 1271–1299. <https://doi.org/10.5194/amt-5-1271-2012>
