# Supplementary material for: Long-term trends in aerosol properties derived from AERONET measurements
Source: Copernicus journal article supplement (doi:10.5194/egusphere-2024-2533), 2024-08-22
Supplement: Supplementary file [file egusphere-2024-2533-AC2-supplement.pdf]

# 1 **Reply to Dr. Collaud Coen**

2 The authors thank Dr. Collaud Coen for her detailed comments and thoughtful suggestions,  
3 which are very helpful in improving our manuscript. We have carefully considered all the  
4 comments and revised the manuscript and the supplementary accordingly. A point-by-  
5 point response to these comments is presented below.

## 6 **General comments:**

- 7 1. Methodology for trend analysis: The authors correctly chose Mann-Kendall test  
8 associated to the Sen's slope, which are both non-parametric methods. The Mann-  
9 Kendall (MK) test giving the statistical significance (ss) is however not described  
10 in the methodology section. The following points have to be clarified:
  - 11 • MK test has to be applied on serially independent data. This means that MK test  
12 without prewhitening can only be applied on time series without ss auto-correlation.  
13 In case of ss auto-correlation, prewhitening methods have to be applied. In this  
14 study, no mention of auto-correlation is found. I then require from the authors that  
15 either to report no ss auto-correlation in all the time series or to use a prewhitening  
16 method to minimize the artifacts bounded to serially dependent data. Since the  
17 authors cite Collaud Coen et al., ACP, 2020, they should also be aware of the  
18 companion paper Collaud Coen et al., AMT, 2020  
19 (<https://amt.copernicus.org/articles/13/6945/2020/> ) on MK methodology and the  
20 associated github repository (<https://github.com/mannkendall>) giving access to a  
21 complete MK and Sen's slope routines with prewhitening methods in R, Python  
22 and Matlab.
  - 23 • MK test also requires a homogeneous distribution, namely no seasonal cycles. The  
24 presence of seasonality in the used time series is clearly visible (e.g. Fig. 4a, b, c,  
25 d, f, Fig. 6 b, c, d, e, g and h, Fig. 10 d, e, f, Fig. 12c). Figs. 7, 8 13 and 14 clearly  
26 present the trend results for meteorological seasons. The methodology is however  
27 not described so that it is not clear if the homogeneity test between season is

28 performed or not. The paper however describes different trends directions for  
29 different seasons (e.g. L 200s). This has to be clarified

- 30 • Concerning seasonality, the climate specificities has also to be taken into account.  
31 The applied seasons correspond to mid-latitude climate but not e.g. to lands with a  
32 monsoon seasonality. The different seasonality has to be taken into account in the  
33 analysis.
- 34 • As specified in Collaud Coen et al., AMT, 2020, the use of a lower time granularity  
35 (e.g. daily) than month could also help to increase MK test's power
- 36 • Finally, confidence limits can also be computed and help the interpretation of the  
37 results.

38 Thank you very much for the detailed comments on techniques. We revised the entire trend  
39 analysis according to your suggestions, and the details of the method to calculate the  
40 significance of MK test has been added in the Sect. 2.3.

41 The previous results did not undergo pre-whitening or seasonal homogeneity tests. We  
42 have attempted to use the algorithm provided by Collaud Coen et al. (2020). We applied  
43 the 3PW pre-whitening method and test the homogeneity. However, using monthly data,  
44 the majority of stations did not pass the seasonal homogeneity test. As the main purpose of  
45 this study is to analyse the multi-year variations of aerosol parameters, we prefer to capture  
46 the trends on an annual scale. Therefore, we decide to calculate the annual trend using  
47 annual mean data, which have limited auto-correlation and no seasonality. As for seasonal  
48 results, we also calculated the seasonal means for each year, and then calculated trends for  
49 each season using the seasonal mean time series. Estimating a valid seasonal trend also  
50 requires at least 10 years of records. However, the updated results are less likely to show  
51 statistical significance due to the reduced sample size.

52 As for the seasonal analysis, we have introduced additional season divisions for the  
53 monsoon (South Asia) and dust source (the Arabian Peninsula and West Africa) regions.  
54 Specifically, for South Asia, the seasons were divided into pre-monsoon (March-May),  
55 monsoon (June-September), post-monsoon (October-November), and winter (December-  
56 February). For the Arabian Peninsula, the seasons were divided into pre-peak (November-

57 February), peak (March-June), and post-peak (July-October) (Habib et al., 2019). For West  
58 Africa, the seasons were classified as Harmattan (November-March) and summer (April-  
59 October) (Balarabe et al., 2016; Nwofor et al., 2007). The description about season  
60 divisions has been added in the caption of Fig. 8.

61 Confidence limits are also calculated, and listed in the tables in the supplementary.

## 62 2. Homogeneity of the time series

63 Long-term trend analysis can only be performed on homogeneous time series. The authors  
64 reported the case of Birdsville, where false results were reported due to false data filtering.  
65 Which procedure was applied to check the homogeneity of the time series ? I do really  
66 appreciate to have all time series in supplement. It's worth to have a look if we are  
67 interested at one particular station.

68 Generally, I would really have a look at all time series and remove too high or too low  
69 values (e.g. SSA below 0.6), to see if too few data are present in the first or end years so  
70 that the time series should be shortened and if there is evident ruptures.

71 Here some comments on the time series:

- 72 • Ames AOD: global decrease but an increase in maxima: to check
- 73 • Amsterdam: strange high values in 2010/2011 and 2014
- 74 • Anmyon and Arica AOD: is there a rupture due to the long missing period ?
- 75 • Bozeman: are high AOD in 2017 and 2021 due to e.g. biomass burning ?
- 76 • Cabauw AOD: I would not consider the 2 data in 2003
- 77 • Canberra: I would not take the too high 1-3 first data
- 78 • Cartel: increasing until 2006 and decreasing after a missing period in 2008-2022:  
79 to check
- 80 • Ceilap: value  $> 0.15$  in 2012 is doubtful
- 81 • Chen-Kung: AOD: I would not use the first two months in 2002, even if MK accept  
82 missing data, having a full first and end years remains important. AE: idem
- 83 • Davos AOD: I would not take the 2001 Data
- 84 • Egbert: do you have an explanation for the high maxima after 2014?
- 85 • Fort-McMurry: I would not take 2005 data

- 86 • Hamburg: AOD I would only use 2003-2016 since there is few data otherwise
- 87 • Morin: strange AOD>4 in 2003
- 88 • Issyk : AOD seems very high in 2021
- 89 • Shiraham: I would stop in 2016
- 90 • Osaka: AOD: I would not use the first two months. The maxima are in 2000-2007
- 91 are much higher than thereafter. Is there a change in 2006-2007? AAOD: the very
- 92 high data (> 0.1) should probably be invalidated and the low data end of 2017 to
- 93 mid-2019 are also strange. SSA : similar comment as for AAOD (but inverse
- 94 dependence)
- 95 • Solar village: AOD: seems ok, SSA: the mid 2000-2002 data seems strange and too
- 96 high and max in 2010 as well as min in 2012 should be checked.
- 97 • Gandhi college: the max at 2.5 is very strange and should be analysed. The four last
- 98 months are also much higher after a missing period. Is there a rupture in the time
- 99 series?
- 100 • Carpentras AOD: the first ~6 months are much higher. AAOD: the 2002-2005 data
- 101 seems too high and a rupture in the time series in the missing period (2005-2006)
- 102 is probable. SSA: the three high values in 2006 should be checked
- 103 • Mexico city: AOD: the three low data in jan-feb 2010 are strange.
- 104 • Missoula AE: I would not use the data before 2004
- 105 • Beijing: AAOD and SSA: I would not use the first isolated 2-3 months
- 106 • GSFC: AAOD: the low minima in 2010 and 2011 should perhaps be investigated
- 107 • MD Science Center SSA: the first high value until 2002 and the high values in 2016-
- 108 2028 should be checked as well as the very low values in 2019.
- 109 • Concerning the AAOD, I just looked at some station: Lille has too few data before
- 110 2007, Rome data are really too low in 2012, there is a problem, White Sands: the
- 111 increase after 2019 is so rapid that it is doubtful
- 112 • Concerning SSA. I have the impression that SSA time series are the more uncertain.
- 113 For example, SSA at Granada is not homogeneous at all, 2012-2026 are too low.
- 114 There si various station with very low SSA (e.g. 0.5 at IMAA-Potenza, 0.3 at OHP)
- 115 that should be removed before the trend analysis. I also have the impression that

116 there is rupture in some dataset such as Tucson, Trelew (in 2017?), Toulon in mid-  
117 2006, Palencia in 2007-2008.

118 Please have a look at all time series to improve their relevance for long-term trend analysis.

119 Thanks for these very detailed comments and careful observation. We have checked these  
120 time series and changed the data filtering strategy. In the previous results using monthly  
121 data to calculate trends, the filtering strategy were used solely to select stations with  
122 extensive records. For the selected sites, all monthly data were used to calculate the trends,  
123 even for years that did not meet the “at least 8 monthly measurements” criterion. Therefore,  
124 some years may have data for only a few months, which led to discontinuity of time series,  
125 such as Cabauw, Chen-Kung, Osaka, etc., as mentioned in the comment. In the updated  
126 results, we switched to use the annual mean data to estimate the annual trends, and data  
127 from the years with less than 8 monthly data have been excluded. Only those years with at  
128 least 8 monthly data were retained to calculate annual and seasonal means. Consequently,  
129 the updated results significantly improve the continuity and homogeneity of the data. Time  
130 series of the following stations mentioned in the comment concerning discontinuity data  
131 have been greatly improved: Cabauw, Chen-Kung, Davos, Fort-McMurry, Hamburg,  
132 Shirahama, Mexico-city, Missoula, Beijing, Lille, and Rome.

133 We also removed outliers for the records, thus time series of the following sites having  
134 doubtful values have been improved: Canberra, Ceilap, and Ilorin.

135 For SSA time series, we removed the very low values (below 0.7) from the “all-point” data.  
136 The very low SSA values often occur alongside low AOD, meaning that these SSA values  
137 are more uncertain.

138 The response to comments for some sites:

- 139 • Ames: The AOD trend is not significant using annual mean value to calculate trend
- 140 • Bozeman: This site is located in western North America. This region was reported to  
141 have increased forest fires (Eck et al., 2023; Iglesias et al., 2022), thus the high AOD  
142 in 2017 and 2021 is likely due to biomass burning.

- 143 • Cartel: This site is located in eastern North America. The AOD time series is similar  
144 to that of other stations (i.e., CCNY) in the region. Other studies using satellite  
145 observations and AERONET measurements also suggested a slight increase in AOD  
146 before 2006 (Zhao et al., 2017; Meij et al., 2012).
- 147 • Issyk: The very high AOD in 2021 is likely attributed to strong dust storms initialized  
148 by Mongolian cyclone (Yu et al., 2023).
- 149 • Osaka: The first two months have been removed because this year did not meet the “at  
150 least 8 monthly measurements” criterion (denoted as “Issue #1”). AOD increased in  
151 2000-2007 and then reduced after 2008 in East Asia. The time series is similar to that  
152 of Li et al. (2014). The very high AAOD in 2011 has been excluded due to “Issue #1”.
- 153 • Solar\_village: The strange SSA values occur alongside low AOD levels in non-peak  
154 seasons when dust is less predominant, thus the SSA is influenced by anthropogenic  
155 aerosols. Moreover, low AOD levels also lead to higher SSA uncertainties. The time  
156 series is similar to that of Li et al. (2014).
- 157 • Gandhi\_college: The extreme high AOD in 2011 has been removed. The four last  
158 months happen to be the winter of 2022 when AOD is high. These data have been  
159 excluded due to “Issue #1”. There is no rupture in the time series using annual mean  
160 data.
- 161 • Carpentras: The AOD and AAOD time series are similar to those of Li et al. (2014).  
162 The three high SSA values in 2006 has been excluded due to “Issue #1”.

163 Time series of other sites were also checked, and the values appear to be reasonable.

### 164 3. Results reported in a map:

165 The representation in a map is very useful to have an overview of the trends around the  
166 world. I have however some remarks:

- 167 • the very small trends (e.g. with AOD slopes in  $[-0.02, 0.02]$  (Fig. 3)) are in white  
168 but still sometimes ss. Since no table with all results are given, it's not easy to know  
169 if the trend are positive or negative. Moreover it means that not ss trend does not  
170 appears on the map since there is no dark circle.

171 • The presented results for all parameters does not correspond neither to the same  
172 time period nor to the same length (e.g. AOD at GSFC corresponds to the 23 y trend  
173 ending in mid-2022, whereas result from Ghandi-College correspond to 17 y trend  
174 ending in 2021 and result from Solar in 13 y results ending in 2013) (+ Fig. 1). My  
175 opinion is that trends with up to 10 y differences for the end point or with large  
176 differences in the length of the time period should not be represented in a similar  
177 way in the same figure. For example, the high positive AOD trend for Solar Village  
178 cannot be compare with the Ghandi or Kampur trends since there is almost one  
179 decade difference of the end time.

180 Thanks for the suggestion. We have edited the colobar to avoid near-white colors.  
181 Moreover, the marks of insignificant trends have been chenged to triangles with black  
182 boundaries. We have also added several tables in the supplementary to list the trends of  
183 parameters of all the stations.

184 Time series of different sites may cover different time periods and have different length,  
185 therefore it is hard to sort them into a few categories. Moreover, the maps in the MS are  
186 mainly used to provide an overview of the spatial patterns about the trends. Detailed  
187 information, such as time periods, could be observed according to time series of individual  
188 sites included in the supplementary material.

189 4. Results with low AOD value and consequently larger uncertainties:

190 As well explained in the manuscript, low AOD values leads to high uncertainties for the  
191 derived parameters. I think that the trends with high uncertainties should appears  
192 differently in the map. I don't know what is the best solution. Perhaps by representing only  
193 trends with 95% confidence level and different size as a function of the uncertainty ?

194 Thanks for the suggestion. It is difficult to represent the uncertainties quantitatively. The  
195 uncertainties of AE, AAOD, and SSA are all correlated with AOD levels, but they do not  
196 have clear relationships. Rough relationships between these parameters and AOD are  
197 discussed in lines 127-128 of the revised manuscript:

198 *“According to Eq. (1), the uncertainty of AE is roughly inversely proportional to AOD,*  
199 *with larger errors at lower AOD conditions.”*

200 and in lines 140-141:

201 *AERONET SSA have an error of  $\pm 0.03$  when  $AOD_{440} \sim 0.4$ , and the error increases*  
202 *rapidly (exponentially) at lower AOD levels.”*

203 All of these parameters (AE, AAOD, SSA) have higher uncertainties at lower AOD levels,  
204 thus AOD levels could be an identifier for uncertainties qualitatively. We have added a  
205 map of AOD in Fig. 3, and added the description about the uncertainties in lines 113-115:

206 *“The patterns of AOD (Fig. 3) and AOD trends (Fig. 4) should be always kept in mind*  
207 *when analyzing trends of the other aerosol parameters, because uncertainties of the other*  
208 *parameters are closely related to AOD level (see below), whose trend reflect changes of*  
209 *aerosol loading.”*

## 210 5. Data used

211 It is not easy to understand which data are used. AERONET Solar Level 2 and AERONET  
212 almucantar Level 1.5 data are both used, the 1.5 ones for the inversion products. L. 87-88  
213 says that L 1.5 are similar to L 2.0 but for the AOD threshold ? meaning that no AOD  
214 threshold are used ? It would be very helpful to have a more precise description with  
215 eventually the mention of the level in the figures' captions.

216 We are sorry for the confusion. This description is generally right. AERONET Solar Level  
217 2.0 data are used in AOD and AE analysis, whereas quality-controlled inversion Level 1.5  
218 data are used in AAOD and SSA analysis. The quality control for Level 1.5 data that we  
219 adopt is the same as that for Level 2.0 except the AOD threshold, as explained below.

220 The reason for not directly using Level 2.0 inversion data (quality assured) is the lack of  
221 data samples (fewer than 10 stations), which is caused by the AOD threshold criterion.  
222 This has been mentioned in the MS in lines 81-83:

223 *“However, as Level 2.0 quality assurance for inversion products requires a coincident*  
224 *AOD exceeding 0.4 at 440 nm, many stations do not have enough data samples to produce*  
225 *a long-term record.”*

226 Nonetheless, Level 1.5 products have larger uncertainties, which is not suitable to be  
227 directly used. As a compromise between data quality and data availability, we apply most



228 of the Level 2.0 quality control criteria on the Level 1.5 inversion data for smaller  
229 uncertainty, only excluding AOD threshold criterion which is an important reason for data  
230 loss. Therefore, the amount of data samples is greatly increased.

231 **Minor comments:**

232 1. Are all the average done with median? Are first daily medians computed and then  
233 monthly medians or is the monthly medians computed from hourly data ?

234 Only monthly data is calculated with median. Annual data and seasonal data are calculated  
235 from the monthly medians. We have added the description in the MS in lines 93-95:

236 *“For the years with at least 8 monthly measurements, the monthly medians are then*  
237 *averaged to annual and seasonal means, which are used to calculate annual and seasonal*  
238 *trends.”*

239 The monthly medians are directly computed from AERONET all-point measurements. The  
240 all-point data has original temporal resolution, which is calculated from every independent  
241 observation of direct solar radiation or diffuse sky radiance.

242 2. L1: there is changes in aerosol composition but also in their concentration.

243 Thanks for reminding. We have revised the description in line 1:

244 *“Over the past two decades, remarkable changes in aerosol concentrations and*  
245 *compositions have been observed worldwide...”*

246 3. L 10: I would specify that AE correspond to the wavelength dependence of AOD,  
247 since AAOD and SSA also depend on the wavelength.

248 We have revised AE to *“AE (computed from the AOD within the range of 440-870 nm)”*  
249 in line 10.

250 4. L17-19: long sentence, please rephrase.

251 We have revised the expression in lines 18-20:

252 *“The reductions of aerosols in eastern North America mainly result from non-absorbing*  
253 *species. Reductions of both fine-mode absorbing species and non-absorbing aerosols are*

254 *found over Europe and East Asia, but the reduction of absorbing species is stronger than*  
255 *that of non-absorbing species.”*

256 5. L 34: “which mainly located in ...”: please check the language

257 Thanks for reminding. We have revised the description in line 35:

258 “... which are mainly located in Europe and North America”

259 6. L35: It is not possible to consider SSA as representative of the scattering. Please  
260 rephrase

261 Thanks for reminding. We have revised the description in lines 35-36:

262 “... and revealed increased scattering aerosol fraction (represented by single scattering  
263 albedo, SSA)”

264 7. L84-85: Considerations on the uncertainties of the various parameters are explained  
265 at various places in the manuscript. Please sample them at the same place so that  
266 the reader can have a direct overview.

267 Thanks for the suggestion. We have regvised the MS and moved the description of these  
268 parameters as well as their uncertainties in Sect. 2.2.

269 8. L 100 and Figs 1 and 2: Figs 1a and b could perhaps be merged with different color  
270 for Level 2 and 1.5? A map (perhaps divided into continents) with all stations’name  
271 could appears in the supplement and/or a table with the stations’coordinates.

272 Thanks for the suggestion. We have revised to use different colors for Level 2.0 solar and  
273 Level 1.5 inversion measurements in Figs. 1a and 1b respectively.

274 We have also added several tables in the supplementaty to list the name, location, trend of  
275 parameters of all the stations.

276 9. L102: does the AE corresponds to a fit including all the wavelengths between 440  
277 and 870 nm?

278 The AE parameter is also a product of AERONET sun direct measurement, and is  
279 calculated from the linear regression of AOD and wavelengths on a logarithmic scale

280 within the range of 440-870 nm (Eck et al., 1999; Giles et al., 2019). All the AOD  
281 measurements within the 440-870 nm are used to calculate AE (Giles et al., 2019). This  
282 has also been mentioned in the MS in lines 107-108:

283 “The AE is calculated from all AOD measurements within the 440–870 nm wavelength  
284 range (typically including 440, 500, 675, and 870 nm)”

#### 285 10. Eck 1999

286 “Eck et al., 1999” refers to the following research article which studied the wavelength  
287 dependence of AOD:

288 Eck, T. F., Holben, B. N., Reid, J. S., Dubovik, O., Smirnov, A., O'Neill, N. T., et al. (1999).  
289 Wavelength dependence of the optical depth of biomass burning, urban, and desert dust  
290 aerosols. *Journal of Geophysical Research: Atmospheres*, 104(D24), 31333–31349.  
291 <https://doi.org/10.1029/1999jd900923>

292 We have cited this reference in several places in the manuscript.

#### 293 11. L 123: what do you mean by “all-point”?

294 We are sorry for the confusion. The meaning of all-point data is detailed in Minor Comment  
295 #1. The “all-point” data is a series of AERONET products with original temporal resolution.  
296 Detailed information could be found from the AERONET website,  
297 <https://aeronet.gsfc.nasa.gov/>.

#### 298 12. Table 1 and L 121: Why Uncertain is not called sea salt ?

299 We are sorry for the confusion. We directly applied the names of the aerosol type from Lee  
300 et al. (2010), which named aerosols with  $FMF_{550}$  below 0.4 and  $SSA_{440}$  higher than 0.95  
301 “Uncertain” type. The 0.95  $SSA_{440}$  threshold is mainly used to identify “Dust” aerosols,  
302 whose  $SSA_{440}$  is typically 0.92-0.93 (Lee et al., 2010). Although sea salt is the coarse-  
303 mode scattering species, the  $SSA_{440}$  for sea salt is typically 0.98 (Lee et al., 2010).  
304 Therefore, the “Uncertain” type includes sea salt aerosols, but not all the “Uncertain”  
305 aerosols are sea salt. As “Uncertain” aerosols only take a negligible proportion (2.5%), we

306 did not further classify them into sea salt and a transitional type. We have revised the  
307 description about sea salt and “Uncertain” type in lines 170-173:

308 *“It should be noted that sea salt aerosols typically having  $FMF_{550}$  below 0.4 and  $SSA_{440}$*   
309 *around 0.98 (included in the "Uncertain" type in Table 1) are not considered in the analysis*  
310 *of aerosol type trends (Sect. 3.3), because most AERONET stations are located over land*  
311 *where sea salt is not the predominant type, and sea salt aerosols only account for a*  
312 *negligible proportion (about 2.5% for "Uncertain" type).”*

313 13. L125: it means that the trend results for the various aerosol types are computed  
314 from time series with three time less data points due to the seasonal median? How  
315 is the seasons defined for monsoon climate ?

316 We are sorry for the confusion. In the updated results, we also used annual mean AOD for  
317 each type to calculate trends. We have revised the description in lines 175-176:

318 *“For each aerosol type, we use coincident Level 2.0  $AOD_{440}$  measurements to calculate*  
319 *the annual AOD and analyze its trend.”*

320 The seasons (MAM, JJA, SON, and DJF) are defined mainly for the mid-latitude, where  
321 most AERONET stations are located. As mentioned in General Comment #1, we have re-  
322 defined seasons for monsoon and dust source regions.

323 14. L130-131: This is not the right causality: negative AOD trends demonstrate the  
324 global reduction of aerosol loading.

325 Thanks for reminding. We have revised the description in lines 181-182:

326 *“Significant negative  $AOD_{440}$  trends are found for the majority of stations all over the*  
327 *world, demonstrating a global reduction of aerosol loading.”*

328 15. L135: Higher slope in Li et al. 2014 can also be due to the shortest time series  
329 leading to larger slopes due to a much lower number of data.

330 Thanks for reminding. We also agree that the higher slope in Li et al. (2014) might be  
331 attributed to a short data record. However, according to the time series of some European

332 stations (Fig. 5), we could still find that the reduction of AOD has slowed down in recent  
333 years. We have revised the description in lines 185-187:

334 *“The rates of AOD<sub>440</sub> reduction in western Europe (about -0.05 per decade) are not as*  
335 *substantial as those reported in Li et al. (2014), which was -0.1 per decade, suggesting a*  
336 *decelerated aerosol reduction rate in Europe in recent years. This is also in line with the*  
337 *AOD<sub>440</sub> time series at representative European sites (Fig. 5g,h).”*

338 16. L139-140: In this case, it is important to know the length and end year of the time  
339 series. Do the larger slopes correspond to the shorter time series ? or to earlier end  
340 year ?

341 Thanks for reminding. The larger slopes indeed correspond to the shorter time series. For  
342 East Asia, Chen-Kung\_ Univ have only 10 years of annual records, and the AOD trend  
343 could reach -0.23 per decade. Osaka has longer AOD records, and the slope is smaller.

344 However, when comparing with other regions (i.e., Europe and North America), the larger  
345 slopes in East Asia do not always correspond to the shorter time series, but correlate with  
346 its higher AOD levels. For example, Beijing and XiangHe have longer records, higher  
347 AOD levels, and larger trends than Brussels and Barcelona. When reducing the same  
348 proportion of AOD, higher AOD levels would lead to larger AOD reductions, thus  
349 corresponds to larger slopes. In this case, according to the AOD time series, the most  
350 considerable AOD reductions indeed occur in East China.

351 17. L141-144: please rephrase

352 We have rephrased the description in lines 194-200:

353 *“However, the trend of AOD<sub>440</sub> in East Asia is not coherent throughout the period of 2000-*  
354 *2022. According to the AOD<sub>440</sub> time series (Fig. 5a-c), AOD<sub>440</sub> increased in the early*  
355 *2000s, and decreased rapidly in the later years since around 2008, consistent with other*  
356 *regional aerosol trend studies (Eom et al., 2022; Gupta et al., 2022; Li, 2020; Lyapustin*  
357 *et al., 2011; Meij et al., 2012; Ramachandran et al., 2020; Ramachandran & Rupakheti,*  
358 *2022; Yoon et al., 2012). This result also explains why Li et al. (2014) found no significant*  
359 *AOD<sub>440</sub> in East Asia with shorter records, as the increase of AOD<sub>440</sub> in the early 2000s*

360 *offset the reduction after 2008. When applying longer records, the continuous reduction of*  
361 *AOD<sub>440</sub> after 2008 become dominant.”*

362 18. L 147-148: does both time series have the same end year ?

363 AOD time series of the two sites have different end years. AOD time series of Beijing  
364 covers the period of 2002-2018, whereas that of XiangHe covers the period of 2005-2021.  
365 We have revised the description in the MS in lines 202-205:

366 *“Both stations possess Level 2.0 records spanning a period of 17 years. However, the data*  
367 *record for Beijing, starting in 2002 and ending in 2018, reveals an AOD<sub>440</sub> trend of -0.175*  
368 *per decade, whereas that for XiangHe, starting in 2005 and ending in 2021, is more recent*  
369 *and exhibits a larger AOD<sub>440</sub> decrease of -0.201 per decade, emphasizing the later years*  
370 *as a period of most notable AOD<sub>440</sub> reduction.”*

371 19. L 150 and L161-162. The special case of Birdsville should be reported only once  
372 in the paper.

373 Thanks for the suggestion. We have reorganized the paragraph. Discussion about Birdsville  
374 and other sites with weak AOD trends has been moved to the second half of the paragraph  
375 in lines 213-216:

376 *“Significant positive AERONET AOD<sub>440</sub> trends over the other regions, such as Birdsville*  
377 *in Australia, Trelew in South America, and Nauru, an oceanic island station, are generally*  
378 *weaker, with magnitudes typically below 0.03 per decade. As these sites have very low*  
379 *AOD<sub>440</sub> (typically below 0.1 for monthly values) as well as low AOD<sub>440</sub> variability, the*  
380 *results in these stations are typically more uncertain.”*

381 20. L159-160: are all these trends ss ?

382 We are sorry for the confusion. We meant to indicate stations with significant positive  
383 AOD trends here. We have clarified this in the MS in line 213:

384 *“Significant positive AERONET AOD<sub>440</sub> trends over the other regions ...”*

385 21. L176: which time series and seasons are less robust due to low AOD ? A map with  
386 AOD values (or seasonal AOD) could perhaps help

387 We have added the map of AOD in Fig. 3, and seasonal AOD maps in the supplementary.  
388 The description about uncertainties of analysed parameters has also been added in Sect. 2.2  
389 in lines 113-115:

390 *“The patterns of AOD (Fig. 3) and AOD trends (Fig. 4) should be always kept in mind*  
391 *when analyzing trends of the other aerosol parameters, because uncertainties of the other*  
392 *parameters are closely related to AOD level (see below), whose trend reflect changes of*  
393 *aerosol loading.”*

394 22. L179: From the map I see 2/4 stations in western North America have positive AE  
395 trends.

396 We are sorry for the confusion. We have updated the result with annual mean time series  
397 (detailed in General Comment #1). In the updated map, 2 stations in western North  
398 America have significant positive AE trends.

399 23. L198-199: I have the impression that no ss AE trends is just an indicator of no  
400 modification of the size distribution. Is it right ?

401 Yes. The statement of reductions in both fine-mode and coarse-mode aerosols is inferred  
402 by both no ss AE trend and ss negative AOD trend. We have revised the expression in lines  
403 235-238 for clarity:

404 *“East Asia exhibits no significant  $AE_{440-870}$  trends, indicating weak changes in the ratio*  
405 *of fine-mode and coarse-mode aerosols. Therefore, the great decrease of aerosol loading in*  
406 *East Asia revealed in Fig. 4 might be related to similar reductions in both anthropogenic*  
407 *fine-mode aerosols and coarse-mode dust in these areas.”*

408 24. L200-201: As mentioned in the general comments, is the homogeneity between the  
409 seasonal trends computed ?

410 As detailed in General comment #1, the majority of stations did not pass the seasonal  
411 homogeneity test. As the main purpose of this study is to analyse the multi-year variations  
412 of averaged aerosol parameters, we updated the results using annual mean data.

413 25. L204-205: Are AOD higher in spring and lower in winter for all stations in the  
414 Northern Hemisphere? Here too a map of AOD for the various seasons could help.

415 Thanks for the suggestion. We have added seasonal AOD maps in the supplementary.

416 26. L 229: please rephrase: AAOD does not characterizes the scattering.

417 Thanks for reminding. We have revised the description in line 134:

418 *“AAOD and SSA together characterize the scattering and absorbing properties of*  
419 *aerosols.”*

420 27. L234-239: this should be discussed in the method/data section.

421 Thanks for the suggestion. The discussion about the uncertainties of AAOD and SSA have  
422 been moved to Sect. 2.2.

423 28. L244: increases in either the concentration of absorbing aerosol or in the  
424 composition (higher imaginary part of the refractive index)

425 Thanks for reminding. Changes in either AE, AAOD, or SSA would indicate changes in  
426 aerosol compositions, as they suggest changes in aerosol size distribution or refractive  
427 index or both. However, in this work, we simply regard aerosols as a mixture of absorbing  
428 and scattering aerosols, and analyze the change of aerosol scattering and absorption  
429 properties.

430 The reason for AAOD change should be analyzed together with trends of other parameters,  
431 especially the AOD trend, which have been added in Sect. 2.2 in lines 113-115:

432 *“The patterns of AOD (Fig. 3) and AOD trends (Fig. 4) should be always kept in mind*  
433 *when analyzing trends of the other aerosol parameters, because uncertainties of the other*  
434 *parameters are closely related to AOD level (see below), whose trend reflect changes of*  
435 *aerosol loading.”*

436 In this case, Solar\_Village have positive AOD trends, thus the increased AOD is likely  
437 related to increases in absorbing aerosols.

438 29. L262: absorbing (b missing)



439 Thanks for reminding. We have revised it in the MS.

440 30. L271-272: Is there not change in BC or BrC concentrations in middle East ?

441 Solar\_Village exhibits significant positive AOD and AAOD trends, as well as negative AE  
442 and SSA trends. This means that Solar\_Village might have higher aerosol concentration,  
443 smaller FMF, and increased absorbing species. As dust is the predominant aerosol, we  
444 could infer increased dust activities according to the trends of these parameters.

445 Changes in BC or BrC is also possible, but we could not infer this according to the trends  
446 of AOD, AE, AAOD, and SSA, especially that the significant negative AE trend suggests  
447 decreased fine mode fraction. Aerosol type analysis in Sect. 3.3 also suggests no significant  
448 trends are found for fine-mode types. Therefore, whether BC/BrC concentration changes  
449 needs further resuarch.

450 31. L 310: I have the impression that, e.g. SSA and AE in western North America,  
451 AOD in India or AAOD in Africa have different seasonal trends (Fig. 14).

452 We are sorry for the confusion. Some regions indeed have different seasonal trends for  
453 some parameters, but seasonal results are generally consistent with annual results at the  
454 majority of regions. Here we meant to express this similarity in pattern. We have revised  
455 the expression in lines 335-336 for clarity:

456 *“Although some regions, such as North India and western North America, have different*  
457 *seasonal and annual trends, the majority of regions do not exhibit significant seasonality.”*

## 458 **References**

459 Balarabe, M., Abdullah, K., & Nawawi, M. (2016). Seasonal variations of aerosol optical  
460 properties and identification of different aerosol types based on AERONET data over sub-  
461 sahara west-africa. *Atmospheric and Climate Sciences*, 06(01), 13–28.  
462 <https://doi.org/10.4236/acs.2016.61002>

463 Collaud Coen, M., Andrews, E., Bigi, A., Martucci, G., Romanens, G., Vogt, F. P. A., &  
464 Vuilleumier, L. (2020). Effects of the prewhitening method, the time granularity, and the  
465 time segmentation on the mann–kendall trend detection and the associated sen’s slope.

466 *Atmospheric Measurement Techniques*, 13(12), 6945–6964. <https://doi.org/10.5194/amt->  
467 [13-6945-2020](https://doi.org/10.5194/amt-13-6945-2020)

468 Eck, T. F., Holben, B. N., Reid, J. S., Dubovik, O., Smirnov, A., O'Neill, N. T., et al. (1999).  
469 Wavelength dependence of the optical depth of biomass burning, urban, and desert dust  
470 aerosols. *Journal of Geophysical Research: Atmospheres*, 104(D24), 31333–31349.  
471 <https://doi.org/10.1029/1999jd900923>

472 Eck, T. F., Holben, B. N., Reid, J. S., Sinyuk, A., Giles, D. M., Arola, A., et al. (2023). The  
473 extreme forest fires in california/oregon in 2020: Aerosol optical and physical properties  
474 and comparisons of aged versus fresh smoke. *Atmospheric Environment*, 305, 119798.  
475 <https://doi.org/10.1016/j.atmosenv.2023.119798>

476 Eom, S., Kim, J., Lee, S., Holben, B. N., Eck, T. F., Park, S.-B., & Park, S. S. (2022).  
477 Long-term variation of aerosol optical properties associated with aerosol types over east  
478 asia using AERONET and satellite (VIIRS, OMI) data (20122019). *Atmospheric Research*,  
479 280, 106457. <https://doi.org/10.1016/j.atmosres.2022.106457>

480 Giles, D. M., Sinyuk, A., Sorokin, M. G., Schafer, J. S., Smirnov, A., Slutsker, I., et al.  
481 (2019). Advancements in the aerosol robotic network (AERONET) version 3 database  
482 automated near-real-time quality control algorithm with improved cloud screening for sun  
483 photometer aerosol optical depth (AOD) measurements. *Atmospheric Measurement*  
484 *Techniques*, 12(1), 169–209. <https://doi.org/10.5194/amt-12-169-2019>

485 Gupta, G., Venkat Ratnam, M., Madhavan, B. L., & Narayanamurthy, C. S. (2022). Long-  
486 term trends in aerosol optical depth obtained across the globe using multi-satellite  
487 measurements. *Atmospheric Environment*, 273, 118953.  
488 <https://doi.org/10.1016/j.atmosenv.2022.118953>

489 Habib, A., Chen, B., Khalid, B., Tan, S., Che, H., Mahmood, T., et al. (2019). Estimation  
490 and inter-comparison of dust aerosols based on MODIS, MISR and AERONET retrievals  
491 over asian desert regions. *Journal of Environmental Sciences*, 76, 154–166.  
492 <https://doi.org/10.1016/j.jes.2018.04.019>

493 Iglesias, V., Balch, J. K., & Travis, W. R. (2022). U.s. Fires became larger, more frequent,  
494 and more widespread in the 2000s. *Science Advances*, 8(11).  
495 <https://doi.org/10.1126/sciadv.abc0020>

496 Lee, J., Kim, J., Song, C. H., Kim, S. B., Chun, Y., Sohn, B. J., & Holben, B. N. (2010).  
497 Characteristics of aerosol types from AERONET sunphotometer measurements.  
498 *Atmospheric Environment*, 44(26), 3110–3117.  
499 <https://doi.org/10.1016/j.atmosenv.2010.05.035>

500 Li, J. (2020). Pollution trends in china from 2000 to 2017: A multi-sensor view from space.  
501 *Remote Sensing*, 12(2), 208. <https://doi.org/10.3390/rs12020208>

502 Li, J., Carlson, B. E., Dubovik, O., & Lacis, A. A. (2014). Recent trends in aerosol optical  
503 properties derived from AERONET measurements. *Atmospheric Chemistry and Physics*,  
504 14(22), 12271–12289. <https://doi.org/10.5194/acp-14-12271-2014>

505 Lyapustin, A., Smirnov, A., Holben, B., Chin, M., Streets, D. G., Lu, Z., et al. (2011).  
506 Reduction of aerosol absorption in beijing since 2007 from MODIS and AERONET.  
507 *Geophysical Research Letters*, 38(10), L10803. <https://doi.org/10.1029/2011gl047306>

508 Meij, A. de, Pozzer, A., & Lelieveld, J. (2012). Trend analysis in aerosol optical depths  
509 and pollutant emission estimates between 2000 and 2009. *Atmospheric Environment*, 51,  
510 75–85. <https://doi.org/10.1016/j.atmosenv.2012.01.059>

511 Nwofor, O. K., Chidiezie Chineke, T., & Pinker, R. T. (2007). Seasonal characteristics of  
512 spectral aerosol optical properties at a sub-saharan site. *Atmospheric Research*, 85(1), 38–  
513 51. <https://doi.org/10.1016/j.atmosres.2006.11.002>

514 Ramachandran, S., & Rupakheti, M. (2022). Trends in physical, optical and chemical  
515 columnar aerosol characteristics and radiative effects over south and east asia: Satellite and  
516 ground-based observations. *Gondwana Research*, 105, 366–387.  
517 <https://doi.org/10.1016/j.gr.2021.09.016>

518 Ramachandran, S., Rupakheti, M., & Lawrence, M. G. (2020). Aerosol-induced  
519 atmospheric heating rate decreases over south and east asia as a result of changing content  
520 and composition. *Scientific Reports*, 10(1). <https://doi.org/10.1038/s41598-020-76936-z>

521 Yoon, J., Hoyningen-Huene, W. von, Kokhanovsky, A. A., Vountas, M., & Burrows, J. P.  
522 (2012). Trend analysis of aerosol optical thickness and ångström exponent derived from  
523 the global AERONET spectral observations. *Atmospheric Measurement Techniques*, 5(6),  
524 1271–1299. <https://doi.org/10.5194/amt-5-1271-2012>

525 Yu, T., Xiaole, P., Yujie, J., Yuting, Z., Weijie, Y., Hang, L., et al. (2023). East asia dust  
526 storms in spring 2021: Transport mechanisms and impacts on china. *Atmospheric Research*,  
527 290, 106773. <https://doi.org/10.1016/j.atmosres.2023.106773>

528 Yu, X., Nichol, J., Lee, K. H., Li, J., & Wong, M. S. (2022). Analysis of long-term aerosol  
529 optical properties combining AERONET sunphotometer and satellite-based observations  
530 in hong kong. *Remote Sensing*, 14(20), 5220. <https://doi.org/10.3390/rs14205220>

531 Zhao, B., Jiang, J. H., Gu, Y., Diner, D., Worden, J., Liou, K.-N., et al. (2017). Decadal-  
532 scale trends in regional aerosol particle properties and their linkage to emission changes.  
533 *Environmental Research Letters*, 12(5), 054021. [https://doi.org/10.1088/1748-  
534 9326/aa6cb2](https://doi.org/10.1088/1748-9326/aa6cb2)

535
